# Supplementary material for: Thrombus Imaging Characteristics to Predict Early Recanalization in Anterior Circulation Large Vessel Occlusion Stroke
Source: MDPI journal article supplement (doi:10.3390/jcdd11040107), 2024-03-29
Supplement: s1 [file s1]

## SUPPLEMENTAL MATERIAL

### Figures

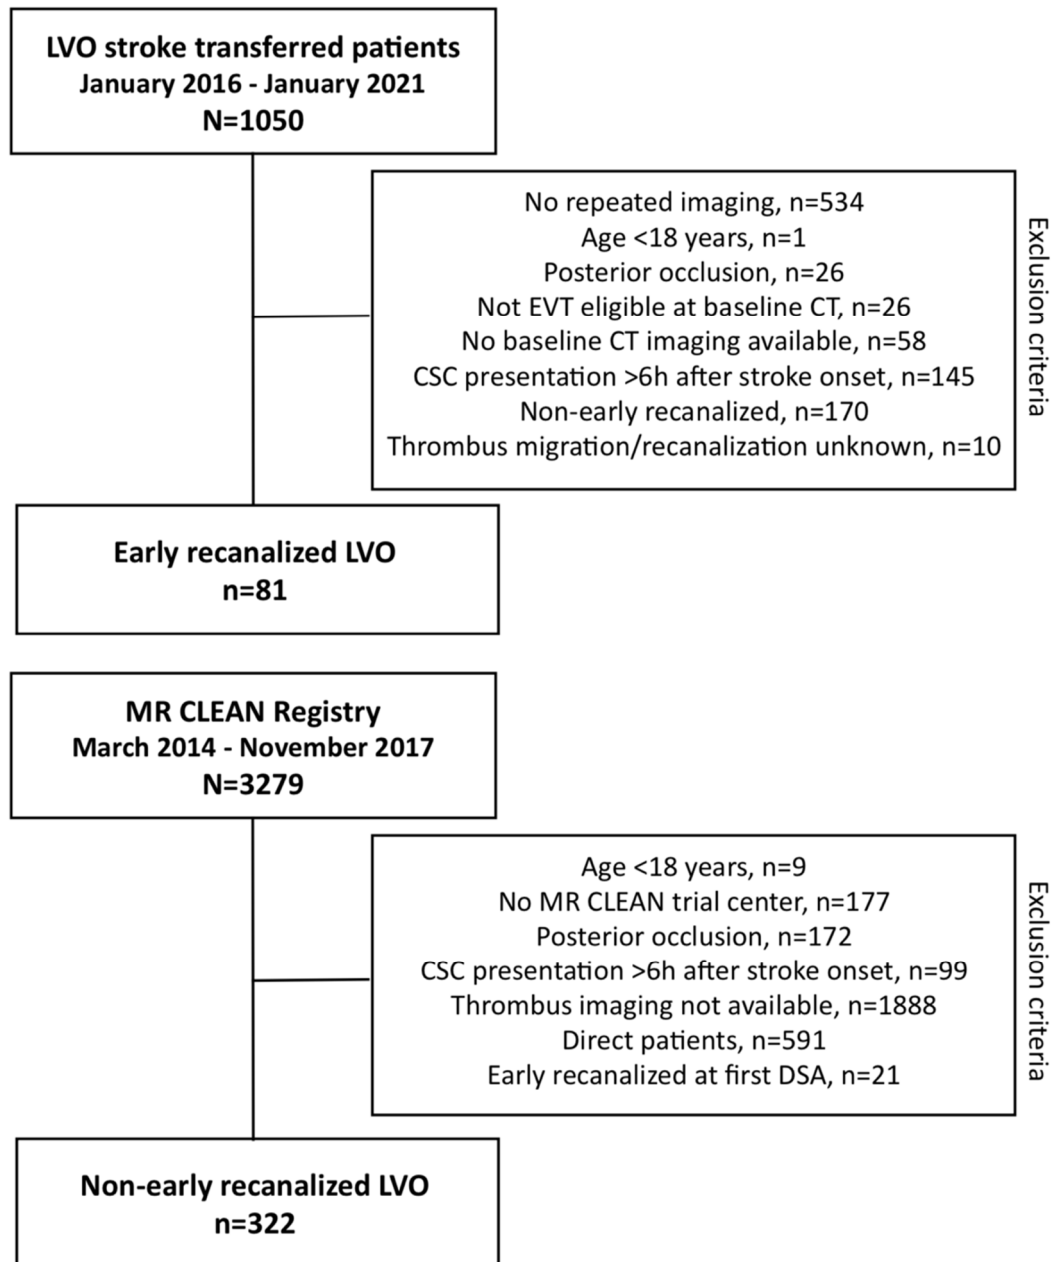

**Supplemental Figure S1: Inclusion flowcharts.** CSC, comprehensive stroke center; CT, computed tomography; DSA, digital subtraction angiography; EVT, endovascular treatment; LVO, large vessel occlusion.

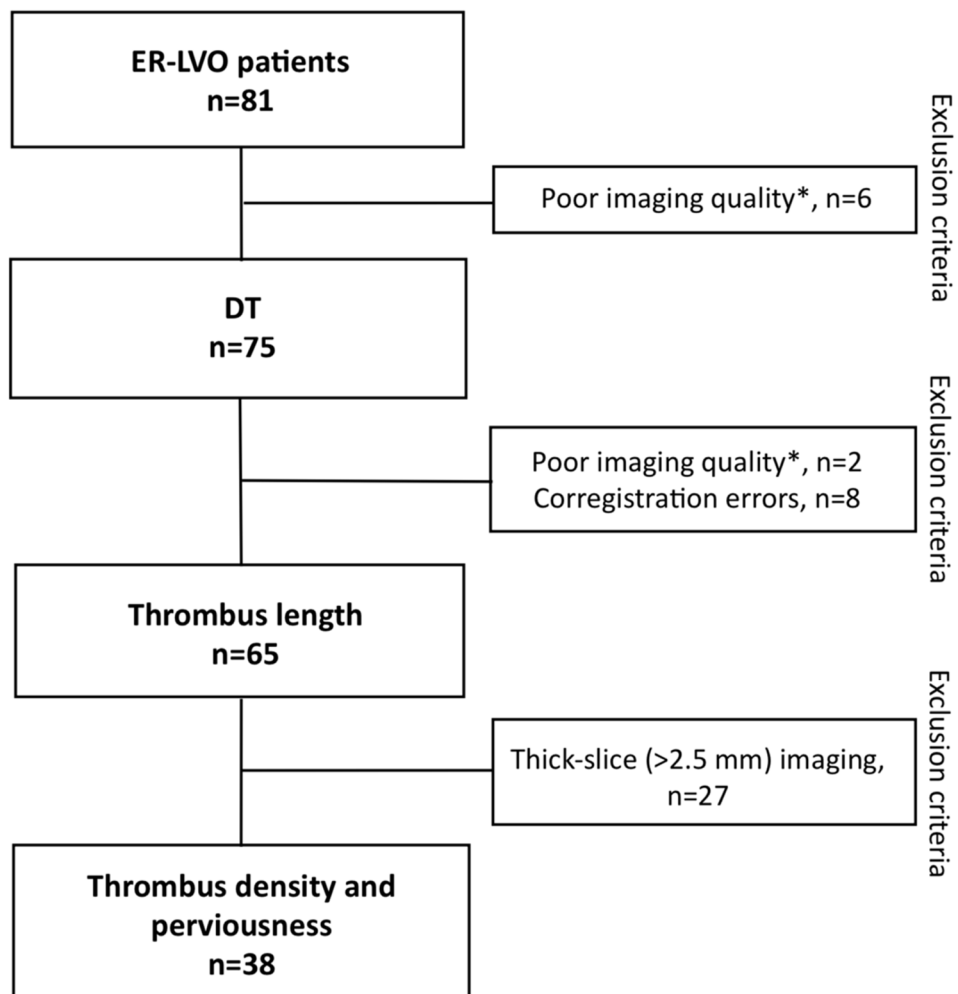

**Supplemental Figure S2: Early recanalization thrombus imaging characteristics inclusion flowchart.** \*movement, metal and beam hardening artefacts, incomplete field of view, excessive noise, and poor contrast opacification in computed tomography angiography scan. *DT*, distance from the intracranial carotid artery terminus to the thrombus.

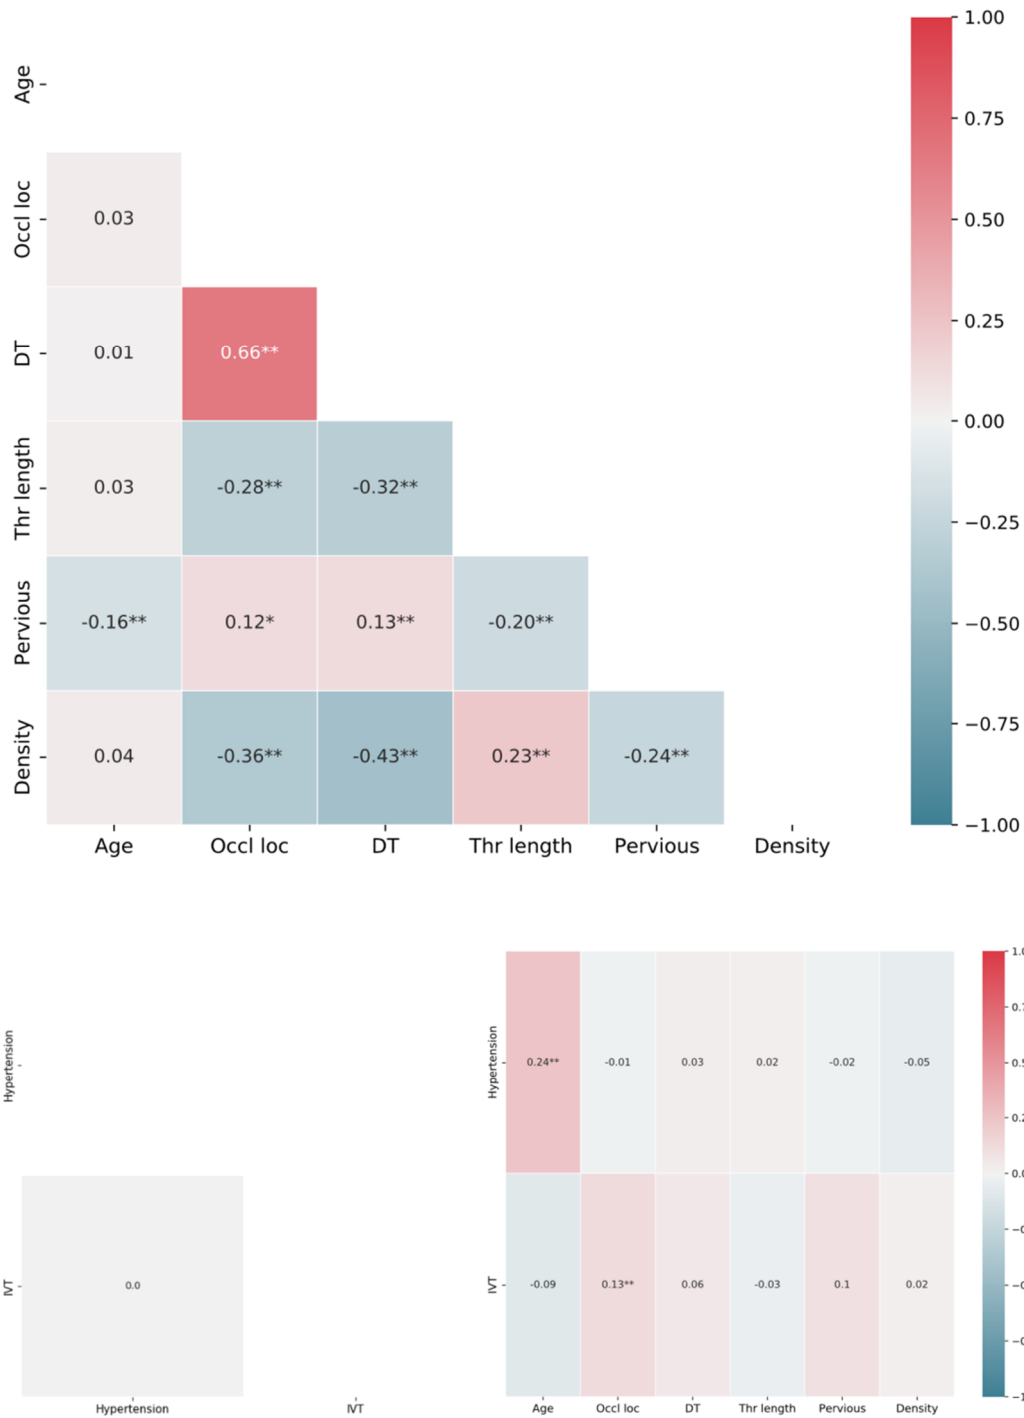

**Supplemental Figure S3. Correlation analysis.** Top: Spearman's correlation coefficients and significance level. Bottom left: Cramer's V coefficients and significance level. Bottom right: Point-biserial correlation coefficients and significance level. '\*\*',  $p < 0.01$ ; '\*',  $p < 0.05$ ; ' ',  $p \geq 0.05$ . Numerical variables: age, DT, thrombus length, thrombus perviousness and thrombus density. Categorical ordinal variables: occlusion location. Categorical binary variables: history of hypertension and IVT administration. *DT*, distance from the intracranial carotid artery terminus to the thrombus; *IVT*, intravenous treatment with alteplase; *loc*, location; *occl*, occlusion; *pervious*, perviousness; *thr*, thrombus.

## **MR CLEAN Registry investigators – Group author**

### **Executive committee**

Diederik W.J. Dippel<sup>1</sup>; Aad van der Lugt<sup>2</sup>; Charles B.L.M. Majoie<sup>3</sup>; Yvo B.W.E.M. Roos<sup>4</sup>; Robert J. van Oostenbrugge<sup>5</sup>; Wim H. van Zwam<sup>6</sup>; Jelis Boiten<sup>14</sup>; Jan Albert Vos<sup>8</sup>.

### **Study coordinators**

Ivo G.H. Jansen<sup>3</sup>; Maxim J.H.L. Mulder<sup>1,2</sup>; Robert- Jan B. Goldhoorn<sup>5,6</sup>; Kars C.J. Compagne<sup>2</sup>; Manon Kappelhof<sup>3</sup>; Josje Brouwer<sup>4</sup>; Sanne J. den Hartog<sup>1,2,40</sup>; Wouter H. Hinsenveld<sup>5,6</sup>.

### **Local principal investigators**

Diederik W.J. Dippel<sup>1</sup>; Bob Roozenbeek<sup>1</sup>; Aad van der Lugt<sup>2</sup>; Adriaan C.G.M. van Es<sup>2</sup>; Charles B.L.M. Majoie<sup>3</sup>; Yvo B.W.E.M. Roos<sup>4</sup>; Bart J. Emmer<sup>3</sup>; Jonathan M. Coutinho<sup>4</sup>; Wouter J. Schonewille<sup>7</sup>; Jan Albert Vos<sup>8</sup>; Marieke J.H. Wermer<sup>9</sup>; Marianne A.A. van Walderveen<sup>10</sup>; Julie Staals<sup>5</sup>; Robert J. van Oostenbrugge<sup>5</sup>; Wim H. van Zwam<sup>6</sup>; Jeannette Hofmeijer<sup>11</sup>; Jasper M. Martens<sup>12</sup>; Geert J. Lycklama à Nijeholt<sup>13</sup>; Jelis Boiten<sup>14</sup>; Sebastiaan F. de Bruijn<sup>15</sup>; Lukas C. van Dijk<sup>16</sup>; H. Bart van der Worp<sup>17</sup>; Rob H. Lo<sup>18</sup>; Ewoud J. van Dijk<sup>19</sup>; Hieronymus D. Boogaarts<sup>20</sup>; J. de Vries<sup>22</sup>; Paul L.M. de Kort<sup>21</sup>; Julia van Tuijl<sup>21</sup>; Jo P. Peluso<sup>26</sup>; Puck Fransen<sup>22</sup>; Jan S.P. van den Berg<sup>22</sup>; Boudewijn A.A.M. van Hasselt<sup>23</sup>; Leo A.M. Aerden<sup>24</sup>; René J. Dallinga<sup>25</sup>; Maarten Uyttenboogaart<sup>28</sup>; Omid Eschgi<sup>29</sup>; Reinoud P.H. Bokkers<sup>29</sup>; Tobien H.C.M.L. Schreuder<sup>30</sup>; Roel J.J. Heijboer<sup>31</sup>; Koos Keizer<sup>32</sup>; Lonneke S.F. Yo<sup>33</sup>; Heleen M. den Hertog<sup>22</sup>; Tomas Bulut<sup>35</sup>; Paul J.A.M. Brouwers<sup>34</sup>.

### **Imaging assessment committee**

Charles B.L.M. Majoie<sup>3</sup> (chair); Wim H. van Zwam<sup>6</sup>; Aad van der Lugt<sup>2</sup>; Geert J. Lycklama à Nijeholt<sup>13</sup>; Marianne A.A. van Walderveen<sup>10</sup>; Marieke E.S. Sprengers<sup>3</sup>; Sjoerd F.M. Jenniskens<sup>27</sup>; René van den Berg<sup>3</sup>; Albert J. Yoo<sup>38</sup>; Ludo F.M. Beenen<sup>3</sup>; Alida A. Postma<sup>6</sup>; Stefan D. Roosendaal<sup>3</sup>; Bas F.W. van der Kallen<sup>13</sup>; Ido R. van den Wijngaard<sup>13</sup>; Adriaan C.G.M. van Es<sup>2</sup>; Bart J. Emmer<sup>3</sup>; Jasper M. Martens<sup>12</sup>; Lonneke S.F. Yo<sup>33</sup>; Jan Albert Vos<sup>8</sup>; Joost Bot<sup>36</sup>; Pieter-Jan van Doormaal<sup>2</sup>; Anton Meijer<sup>27</sup>; Elyas Ghariq<sup>13</sup>; Reinoud P.H. Bokkers<sup>29</sup>; Marc P. van Proosdij<sup>37</sup>; G. Menno Krietemeijer<sup>33</sup>; Jo P. Peluso<sup>26</sup>; Hieronymus D. Boogaarts<sup>20</sup>; Rob Lo<sup>18</sup>; Wouter Dinkelaar<sup>2</sup>; Auke P.A. Appelman<sup>29</sup>; Bas Hammer<sup>16</sup>; Sjoert Pegge<sup>27</sup>; Anouk van der Hoorn<sup>29</sup>; Saman Vinke<sup>20</sup>.

### **Writing committee**

Diederik W.J. Dippel<sup>1</sup> (chair); Aad van der Lugt<sup>2</sup>; Charles B.L.M. Majoie<sup>3</sup>; Yvo B.W.E.M. Roos<sup>4</sup>; Robert J. van Oostenbrugge<sup>5</sup>; Wim H. van Zwam<sup>6</sup>; Geert J. Lycklama à Nijeholt<sup>13</sup>; Jelis Boiten<sup>14</sup>; Jan Albert Vos<sup>8</sup>; Wouter J. Schonewille<sup>7</sup>; Jeannette Hofmeijer<sup>11</sup>; Jasper M. Martens<sup>12</sup>; H. Bart van der Worp<sup>17</sup>; Rob H. Lo<sup>18</sup>.

### **Adverse event committee**

Robert J. van Oostenbrugge<sup>5</sup> (chair); Jeannette Hofmeijer<sup>11</sup>; H. Zwenneke Flach<sup>23</sup>.

### **Trial methodologist**

Hester F. Lingsma<sup>40</sup>.

### **Research nurses / local trial coordinators**

Naziha el Ghannouti<sup>1</sup>; Martin Sterrenberg<sup>1</sup>; Wilma Pellikaan<sup>7</sup>; Rita Sprengers<sup>4</sup>; Marjan Elfrink<sup>11</sup>; Michelle Simons<sup>11</sup>; Marjolein Vossers<sup>12</sup>; Joke de Meris<sup>14</sup>; Tamara Vermeulen<sup>14</sup>; Annet Geerlings<sup>19</sup>; Gina van Vemde<sup>22</sup>; Tiny Simons<sup>30</sup>; Gert Messchendorp<sup>28</sup>; Nynke Nicolaij<sup>28</sup>; Hester Bongenaar<sup>32</sup>; Karin Bodde<sup>24</sup>; Sandra Kleijn<sup>34</sup>; Jasmijn Lodico<sup>34</sup>; Hanneke Droste<sup>34</sup>; Maureen Wollaert<sup>5</sup>; Sabrina Verheesen<sup>5</sup>; D. Jeurissen<sup>5</sup>; Erna Bos<sup>9</sup>; Yvonne Drabbe<sup>15</sup>; Michelle Sandiman<sup>15</sup>; Nicoline Aaldering<sup>11</sup>; Berber Zweedijk<sup>17</sup>; Jocova Vervoort<sup>21</sup>; Eva Ponjee<sup>22</sup>; Sharon Romviel<sup>19</sup>; Karin Kanselaar<sup>19</sup>; Denn Barning<sup>10</sup>.

### **PhD / Medical students:**

Esmee Venema<sup>40</sup>; Vicky Chalos<sup>1,40</sup>; Ralph R. Geuskens<sup>3</sup>; Tim van Straaten<sup>19</sup>; Saliha Ergezen<sup>1</sup>; Roger R.M. Harmsma<sup>1</sup>; Daan Muijres<sup>1</sup>; Anouk de Jong<sup>1</sup>; Olvert A. Berkhemer<sup>1,3,6</sup>; Anna M.M. Boers<sup>3,39</sup>; J. Huguet<sup>3</sup>; P.F.C. Groot<sup>3</sup>; Marieke A. Mens<sup>3</sup>; Katinka R. van Kranendonk<sup>3</sup>; Kilian M. Treurniet<sup>3</sup>; Manon L. Tolhuisen<sup>3,39</sup>; Heitor Alves<sup>3</sup>; Annick J. Weterings<sup>3</sup>; Eleonora L.F. Kirkels<sup>3</sup>; Eva J.H.F. Voogd<sup>11</sup>; Lieve M. Schupp<sup>3</sup>; Sabine L. Collette<sup>28,29</sup>; Adrien E.D. Groot<sup>4</sup>; Natalie E. LeCouffe<sup>4</sup>; Praneeta R. Konduri<sup>39</sup>; Haryadi Prasetya<sup>39</sup>; Nerea Arrarte-Terreros<sup>39</sup>; Lucas A. Ramos<sup>39</sup>.

### **List of affiliations**

Department of Neurology<sup>1</sup>, Radiology<sup>2</sup>, Public Health<sup>40</sup>, Erasmus MC University Medical Center;

Department of Radiology and Nuclear Medicine<sup>3</sup>, Neurology<sup>4</sup>, Biomedical Engineering & Physics<sup>39</sup>, Amsterdam UMC, University of Amsterdam, Amsterdam;

Department of Neurology<sup>5</sup>, Radiology<sup>6</sup>, Maastricht University Medical Center and Cardiovascular Research Institute Maastricht (CARIM);

Department of Neurology<sup>7</sup>, Radiology<sup>8</sup>, Sint Antonius Hospital, Nieuwegein;

Department of Neurology<sup>9</sup>, Radiology<sup>10</sup>, Leiden University Medical Center;

Department of Neurology<sup>11</sup>, Radiology<sup>12</sup>, Rijnstate Hospital, Arnhem;

Department of Radiology<sup>13</sup>, Neurology<sup>14</sup>, Haaglanden MC, the Hague;

Department of Neurology<sup>15</sup>, Radiology<sup>16</sup>, HAGA Hospital, the Hague;

Department of Neurology<sup>17</sup>, Radiology<sup>18</sup>, University Medical Center Utrecht;

Department of Neurology<sup>19</sup>, Neurosurgery<sup>20</sup>, Radiology<sup>27</sup>, Radboud University Medical Center, Nijmegen;

Department of Neurology<sup>21</sup>, Radiology<sup>26</sup>, Elisabeth-TweeSteden ziekenhuis, Tilburg;

Department of Neurology<sup>22</sup>, Radiology<sup>23</sup>, Isala Klinieken, Zwolle;

Department of Neurology<sup>24</sup>, Radiology<sup>25</sup>, Reinier de Graaf Gasthuis, Delft;

Department of Neurology<sup>28</sup>, Radiology<sup>29</sup>, University Medical Center Groningen;

Department of Neurology<sup>30</sup>, Radiology<sup>31</sup>, Atrium Medical Center, Heerlen;

Department of Neurology<sup>32</sup>, Radiology<sup>33</sup>, Catharina Hospital, Eindhoven;

Department of Neurology<sup>34</sup>, Radiology<sup>35</sup>, Medisch Spectrum Twente, Enschede;

Department of Radiology<sup>36</sup>, Amsterdam UMC, Vrije Universiteit van Amsterdam, Amsterdam;

Department of Radiology<sup>37</sup>, Noordwest Ziekenhuisgroep, Alkmaar;

Department of Radiology<sup>38</sup>, Texas Stroke Institute, Texas, United States of America.
